# Supplementary material for: N,S coordination in Ni single-atom catalyst promoting CO2RR towards HCOOH
Source: Royal Society of Chemistry journal article supplement (doi:10.1039/d3cp03722c), 2023-01-01
Supplement: d3cp03722c1.pdf [file d3cp03722c1.pdf]

## SUPPORTING INFORMATION

### **N, S coordination in Ni single atom catalyst promoting CO<sub>2</sub>RR towards HCOOH**

Zengxuan Chen<sup>a</sup>, Shoufu Cao<sup>a</sup>, Jiao Li<sup>a</sup>, Chunyu Yang<sup>a</sup>, Shuxian Wei<sup>b</sup>, Siyuan Liu<sup>a</sup>,  
Zhaojie Wang<sup>a\*</sup>, Xiaoqing Lu<sup>a\*</sup>

<sup>a</sup> *School of Materials Science and Engineering, China University of Petroleum,  
Qingdao, Shandong 266580, P. R. China*

<sup>b</sup> *College of Science, China University of Petroleum, Qingdao, Shandong 266580, P.  
R. China*

\* Corresponding authors: Zhaojie Wang and Xiaoqing Lu

E-mail address: wangzhaojie@upc.edu.cn and luxq@upc.edu.cn

**Figure S1.** Optimized structures of (a)  $\text{NiN}_2\text{S}_2$ -1, (b)  $\text{NiN}_1\text{S}_3$ , and (c)  $\text{NiS}_4$ .

**Figure S2.** Charge density difference of  $\text{NiN}_2\text{S}_2$ -1,  $\text{NiN}_1\text{S}_3$ , and  $\text{NiS}_4$ . Yellow and cyan regions represent increasing and decreasing electron densities, respectively, and the isosurface values were  $2 \times 10^{-3} \text{ e per Bohr}^3$ .

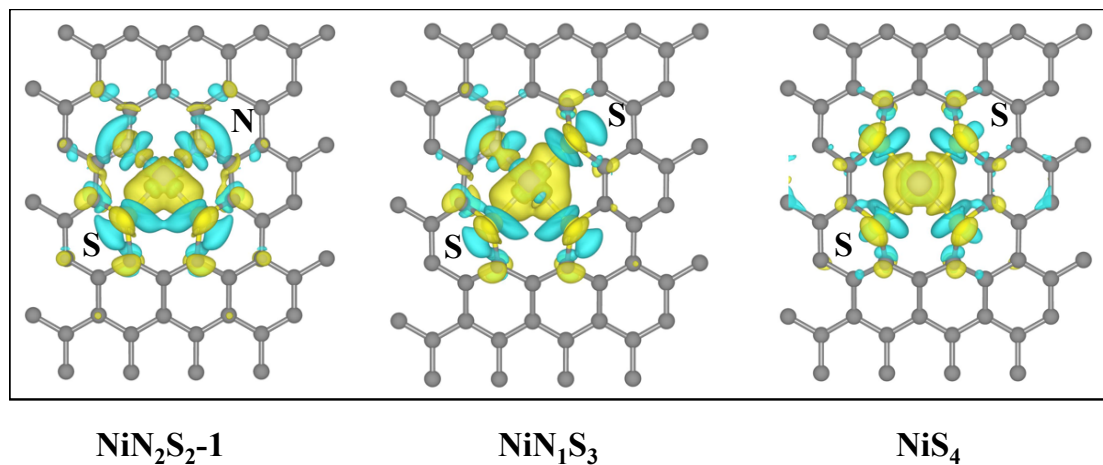

**Figure S3.** Optimized adsorption configurations and adsorption energies of CO<sub>2</sub> on NiN<sub>4</sub> under different potentials.

| potentials | 0V                                                                                                               | -0.23V                                                                                                           | -0.54V                                                                                                            | -0.84V                                                                                                             |
|------------|------------------------------------------------------------------------------------------------------------------|------------------------------------------------------------------------------------------------------------------|-------------------------------------------------------------------------------------------------------------------|--------------------------------------------------------------------------------------------------------------------|
| top-view   | 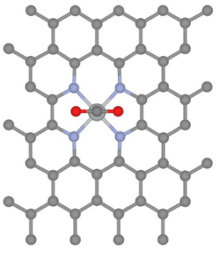                                |                                 |                                 |                                 |
| Side-view  | <br>CO <sub>2 ads</sub> -0.58eV | <br>CO <sub>2 ads</sub> -0.71eV | <br>CO <sub>2 ads</sub> -0.64eV | <br>CO <sub>2 ads</sub> -0.37eV |

**Figure S4.** Free energy profiles of CO<sub>2</sub>RR to (a) CO and (b) HCOOH on NiN<sub>2</sub>S<sub>2</sub>-1, NiN<sub>1</sub>S<sub>3</sub>, and NiS<sub>4</sub>.

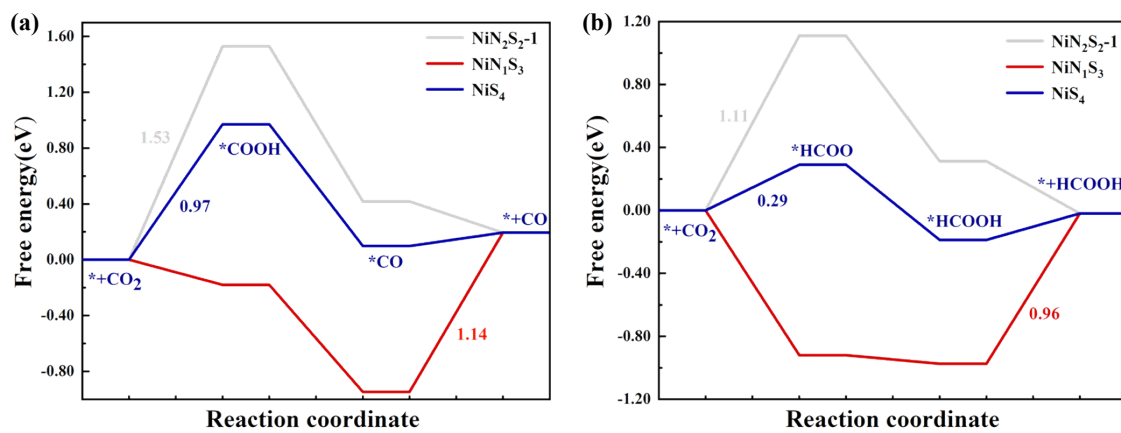

**Figure S5.** Optimized adsorption configurations of CO<sub>2</sub> and H on NiN<sub>4</sub>, NiN<sub>3</sub>S<sub>1</sub>, and NiN<sub>2</sub>S<sub>2</sub>.

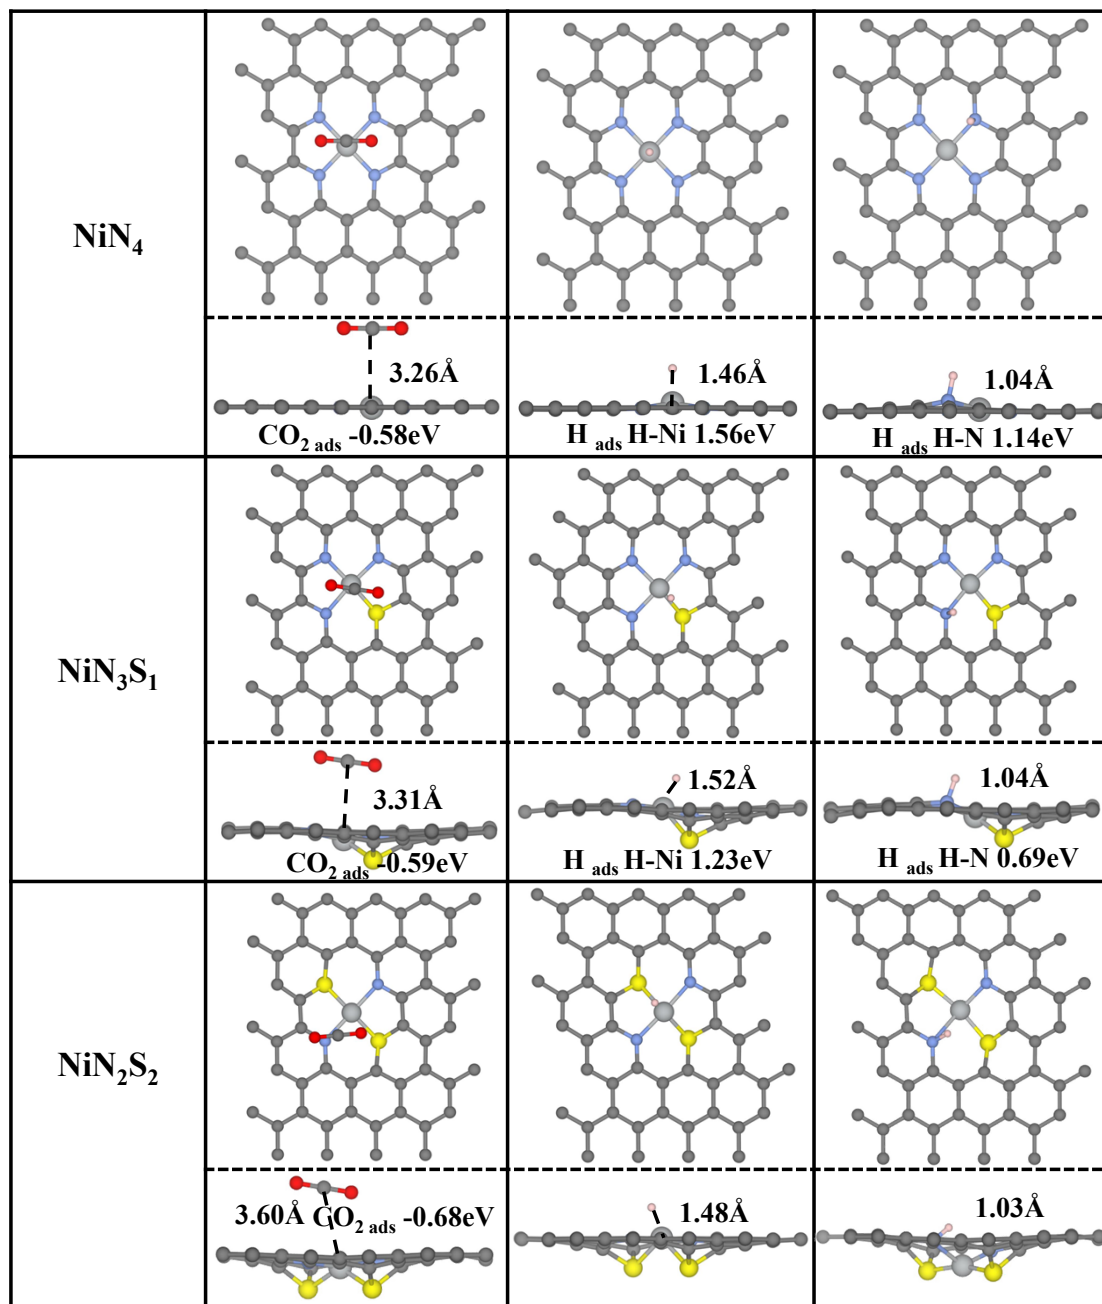

**Figure S6.** (a) Summary of limiting potential ( $U_L^{\text{CO}_2\text{RR}}$ ) of products for the CO and HCOOH productions on NiN<sub>2</sub>S<sub>2</sub>-1, NiN<sub>1</sub>S<sub>3</sub> and NiS<sub>4</sub>. (b) Limiting potential difference between CO<sub>2</sub>RR and HER ( $U_L^{\text{CO}_2\text{RR}} - U_L^{\text{HER}}$ ).

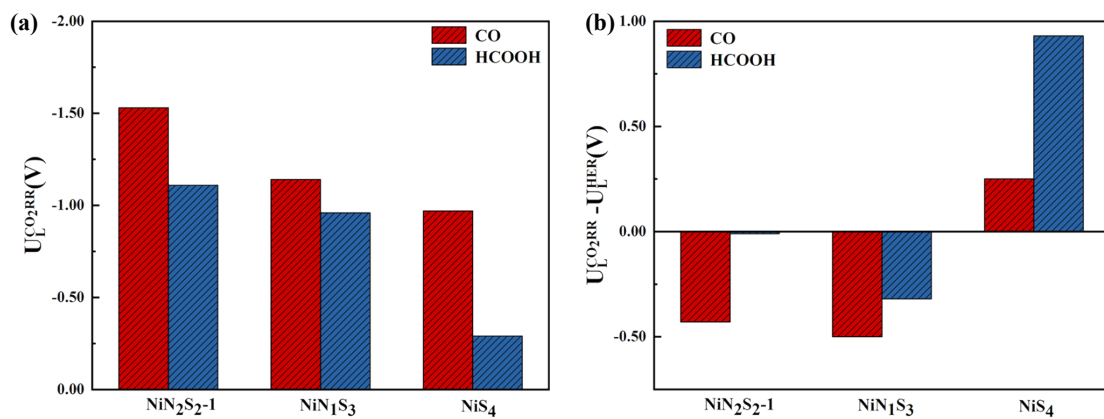

**Table S1.** Cohesive energy  $E_{\text{coh}}$ , formation energies  $E_f$ , and dissolution potential  $U_{\text{diss}}$  of  $\text{NiN}_x\text{S}_y$ .

| $\text{NiN}_x\text{S}_y$          | $E_{\text{coh}}$ (eV) | $E_f$ (eV) | $U_{\text{diss}}$ (V) |
|-----------------------------------|-----------------------|------------|-----------------------|
| $\text{NiN}_4$                    | 9.03                  | -6.39      | 2.93                  |
| $\text{NiN}_3\text{S}_1$          | 8.89                  | -4.57      | 2.02                  |
| $\text{NiN}_2\text{S}_2$          | 8.76                  | -2.62      | 1.05                  |
| $\text{NiN}_2\text{S}_2\text{-1}$ | 8.78                  | -4.37      | 1.93                  |
| $\text{NiN}_1\text{S}_3$          | 8.64                  | -2.28      | 0.88                  |
| $\text{NiS}_4$                    | 8.52                  | -2.69      | 1.09                  |



**Table S2.** Proposed elementary steps and free energy changes for CO<sub>2</sub>RR pathways on NiN<sub>4</sub>, NiN<sub>3</sub>S<sub>1</sub>, and NiN<sub>2</sub>S<sub>2</sub> at 0 V versus SHE.

| Elementary step                            | $\Delta G/eV$    |                                 |                                 |
|--------------------------------------------|------------------|---------------------------------|---------------------------------|
|                                            | NiN <sub>4</sub> | NiN <sub>3</sub> S <sub>1</sub> | NiN <sub>2</sub> S <sub>2</sub> |
| $CO_2 + H^+ + e^- \rightarrow *COOH$       | 1.47             | 1.19                            | 0.57                            |
| $*COOH + H^+ + e^- \rightarrow *CO + H_2O$ | -0.95            | -0.90                           | -0.91                           |
| $*CO \rightarrow CO + *$                   | -0.64            | -0.10                           | 0.53                            |
| $*CO_2 + H^+ + e^- \rightarrow *HCOO$      | 1.14             | 0.50                            | -0.18                           |
| $*HCOO + H^+ + e^- \rightarrow *HCOOH$     | -0.66            | -0.10                           | 0.24                            |
| $*HCOOH \rightarrow HCOOH + *$             | -0.43            | -0.42                           | -0.08                           |

**Table S3.** Summary of CO<sub>2</sub>RR potential determining steps (PDS), limiting potential ( $U_L^{CO_2RR}$ ) of CO<sub>2</sub>RR and limiting potential difference between CO<sub>2</sub>RR and HER ( $U_L^{CO_2RR} - U_L^{HER}$ ) on NiN<sub>4</sub>, NiN<sub>3</sub>S<sub>1</sub> and NiN<sub>2</sub>S<sub>2</sub>.

| Catalysts                       | Products | PDS                                                        | $\Delta G/eV$ | $U_L^{CO_2RR} / V$<br>vs RHE | $U_L^{CO_2RR} - U_L^{HER} / V$<br>vs RHE |
|---------------------------------|----------|------------------------------------------------------------|---------------|------------------------------|------------------------------------------|
| NiN <sub>4</sub>                | CO       | *CO <sub>2</sub> + H <sup>+</sup> + e <sup>-</sup> → *COOH | 1.47          | -1.47                        | -0.33                                    |
|                                 | HCOOH    | *CO <sub>2</sub> + H <sup>+</sup> + e <sup>-</sup> → *HCOO | 1.14          | -1.14                        | 0                                        |
| NiN <sub>3</sub> S <sub>1</sub> | CO       | *CO <sub>2</sub> + H <sup>+</sup> + e <sup>-</sup> → *COOH | 1.19          | -1.19                        | -0.50                                    |
|                                 | HCOOH    | *CO <sub>2</sub> + H <sup>+</sup> + e <sup>-</sup> → *HCOO | 0.50          | -0.50                        | 0.19                                     |
| NiN <sub>2</sub> S <sub>2</sub> | CO       | CO <sub>2</sub> + H <sup>+</sup> + e <sup>-</sup> → *COOH  | 0.57          | -0.57                        | -0.20                                    |
|                                 | HCOOH    | *HCOO + H <sup>+</sup> + e <sup>-</sup> → *HCOOH           | 0.24          | -0.24                        | 0.13                                     |

**Table S4.** Summary of CO<sub>2</sub>RR potential determining steps (PDS), limiting potential ( $U_L^{CO_2RR}$ ) of CO<sub>2</sub>RR and limiting potential difference between CO<sub>2</sub>RR and HER ( $U_L^{CO_2RR} - U_L^{HER}$ ) on NiN<sub>2</sub>S<sub>2</sub>-1, NiN<sub>1</sub>S<sub>3</sub> and NiS<sub>4</sub>.

| Catalysts                          | Products | PDS                                                        | $\Delta G/eV$ | $U_L^{CO_2RR} / V$<br>vs RHE | $U_L^{CO_2RR} - U_L^{HER} / V$<br>vs RHE |
|------------------------------------|----------|------------------------------------------------------------|---------------|------------------------------|------------------------------------------|
| NiN <sub>2</sub> S <sub>2</sub> -1 | CO       | *CO <sub>2</sub> + H <sup>+</sup> + e <sup>-</sup> → *COOH | 1.53          | -1.53                        | -0.43                                    |
|                                    | HCOOH    | *CO <sub>2</sub> + H <sup>+</sup> + e <sup>-</sup> → *HCOO | 1.11          | -1.11                        | -0.01                                    |
| NiN <sub>1</sub> S <sub>3</sub>    | CO       | *CO → * + CO                                               | 1.14          | -1.14                        | -0.50                                    |
|                                    | HCOOH    | *HCOOH → * + HCOOH                                         | 0.96          | -0.96                        | -0.32                                    |
| NiS <sub>4</sub>                   | CO       | *CO <sub>2</sub> + H <sup>+</sup> + e <sup>-</sup> → *COOH | 0.97          | -0.97                        | 0.25                                     |
|                                    | HCOOH    | *CO <sub>2</sub> + H <sup>+</sup> + e <sup>-</sup> → *HCOO | 0.29          | -0.29                        | 0.93                                     |
